# Supplementary material
Source: Springer Nature journal article supplement (https://www.springermedizin.de/resource/supplementary/12883_2014_1042_MOESM2_ESM.pdf/9456400)
Supplement: MOESM2 [file 9456400]

Table 1

| Nerve                                           | Index         |                       | Sister        |                       | Mother        |                       |
|-------------------------------------------------|---------------|-----------------------|---------------|-----------------------|---------------|-----------------------|
|                                                 | CMAP/mV       | mNCV/ms <sup>-1</sup> | CMAP/mV       | mNCV/ms <sup>-1</sup> | CMAP/mV       | mNCV/ms <sup>-1</sup> |
| N. ulnaris [4,0 mV / 50 ms <sup>-1</sup> ]      | 23            | 68                    | 19            | 61                    | 15            | 57                    |
| N. tibialis [5,0 mV / 40 ms <sup>-1</sup> ]     | 11            | 51                    | 24            | 51                    | 6,4           | 40                    |
| N. peroneus [4,0 mV / 41 ms <sup>-1</sup> ]     | 9,9           | 47                    | n.d.          | n.d.                  | n.d.          | n.d.                  |
| Nerve                                           | Index         |                       | Sister        |                       | Mother        |                       |
|                                                 | SNAP/ $\mu$ V | sNCV/ms <sup>-1</sup> | SNAP/ $\mu$ V | sNCV/ms <sup>-1</sup> | SNAP/ $\mu$ V | sNCV/ms <sup>-1</sup> |
| N. radialis [16 $\mu$ V / 55 ms <sup>-1</sup> ] | 8,8           | 67                    | 15            | 55                    | 6,1           | 58                    |
| N. suralis [3,8 $\mu$ V / 39 ms <sup>-1</sup> ] | 1,6           | 50                    | 2,7           | 43                    | $\emptyset$   | n.a.                  |
| Muscle                                          | Index         |                       | Sister        |                       | Mother        |                       |
|                                                 | ASA           | MUAP/mV               | ASA           | MUAP/mV               | ASA           | MUAP/mV               |
| M. deltoideus [1,5 mV]                          | $\emptyset$   | 2,0                   | $\emptyset$   | 2,7                   | $\emptyset$   | 6,4                   |
| M. IOD1 [2,3 mV]                                | $\emptyset$   | 7,5                   | n.d.          | n.d.                  | $\emptyset$   | 12                    |
| M. vastus medialis [2,0 mV]                     | $\emptyset$   | 16                    | $\emptyset$   | 28                    | $\emptyset$   | 28                    |
| M. tibialis anterior [1,6 mV]                   | $\emptyset$   | 4,3                   | n.d.          | n.d.                  | n.d.          | n.d.                  |

Table 2

| Mutation         |                      |            |             |              |                        |  |
|------------------|----------------------|------------|-------------|--------------|------------------------|--|
| DNA              | Protein              | Expression | RING domain | Transmission | Reference              |  |
| c.1913-1G>A      | p.Glu638Ala/fsX7     | ∅          | n.a.        | recessive    | Guernsey et al. [2010] |  |
| c.2122-2123insGC | p.Leu708Arg/fsX28    | n.d.       | disrupted   | dominant     | Weterman et al. [2012] |  |
| c.2047-1G>A      | p.Ala683ProfsX3      | +          | disrupted   | dominant     | Nicolaou et al. [2013] |  |
| c.2046+1G>T      | p.Glu682_Ala683ins21 | n.d.       | disrupted   | dominant     | herein                 |  |
